# Supplementary material for: Cardiovascular Disease Risk Factors in Ghana during the Rural-to-Urban Transition: A Cross-Sectional Study
Source: PubMed Central journal article supplement (PMC5061429; doi:10.1371/journal.pone.0162753), 2016-10-12

# HEALTH INFORMATION

## MEHARRY MEDICAL COLLEGE/UNIVERSITY OF GHANA

Date of Exam:

|       |  |   |     |  |   |      |   |   |   |
|-------|--|---|-----|--|---|------|---|---|---|
|       |  | / |     |  | / | 2    | 0 | 0 | 5 |
| Month |  |   | Day |  |   | Year |   |   |   |

Family ID:

|  |  |  |  |  |  |  |  |  |  |
|--|--|--|--|--|--|--|--|--|--|
|  |  |  |  |  |  |  |  |  |  |
|--|--|--|--|--|--|--|--|--|--|

Identification Number:

|   |   |   |   |   |  |  |  |  |  |
|---|---|---|---|---|--|--|--|--|--|
| G | H | A | T | R |  |  |  |  |  |
|---|---|---|---|---|--|--|--|--|--|

Individual's Last Name:

|  |  |  |  |  |  |  |  |  |  |  |  |  |  |  |  |  |  |  |  |
|--|--|--|--|--|--|--|--|--|--|--|--|--|--|--|--|--|--|--|--|
|  |  |  |  |  |  |  |  |  |  |  |  |  |  |  |  |  |  |  |  |
|--|--|--|--|--|--|--|--|--|--|--|--|--|--|--|--|--|--|--|--|

Individual's First Name:

|  |  |  |  |  |  |  |  |  |  |  |  |  |  |  |  |  |  |  |  |
|--|--|--|--|--|--|--|--|--|--|--|--|--|--|--|--|--|--|--|--|
|  |  |  |  |  |  |  |  |  |  |  |  |  |  |  |  |  |  |  |  |
|--|--|--|--|--|--|--|--|--|--|--|--|--|--|--|--|--|--|--|--|

**A1. ADDRESS**

City: 

|  |  |  |  |  |  |  |  |  |  |  |  |  |  |  |  |  |  |  |  |
|--|--|--|--|--|--|--|--|--|--|--|--|--|--|--|--|--|--|--|--|
|  |  |  |  |  |  |  |  |  |  |  |  |  |  |  |  |  |  |  |  |
|--|--|--|--|--|--|--|--|--|--|--|--|--|--|--|--|--|--|--|--|

 State: 

|  |  |
|--|--|
|  |  |
|--|--|

 Zip Code: 

|  |  |  |  |  |  |
|--|--|--|--|--|--|
|  |  |  |  |  |  |
|--|--|--|--|--|--|

Country (If not USA): 

|   |   |   |   |   |  |  |  |  |  |  |  |  |  |  |  |  |  |  |  |
|---|---|---|---|---|--|--|--|--|--|--|--|--|--|--|--|--|--|--|--|
| G | H | A | N | A |  |  |  |  |  |  |  |  |  |  |  |  |  |  |  |
|---|---|---|---|---|--|--|--|--|--|--|--|--|--|--|--|--|--|--|--|

Telephone Number (Including Area Code):  
Home: 

|  |  |  |  |  |  |  |  |  |  |  |  |  |  |  |  |  |  |  |  |
|--|--|--|--|--|--|--|--|--|--|--|--|--|--|--|--|--|--|--|--|
|  |  |  |  |  |  |  |  |  |  |  |  |  |  |  |  |  |  |  |  |
|--|--|--|--|--|--|--|--|--|--|--|--|--|--|--|--|--|--|--|--|

 Work: 

|  |  |  |  |  |  |  |  |  |  |  |  |  |  |  |  |  |  |  |  |
|--|--|--|--|--|--|--|--|--|--|--|--|--|--|--|--|--|--|--|--|
|  |  |  |  |  |  |  |  |  |  |  |  |  |  |  |  |  |  |  |  |
|--|--|--|--|--|--|--|--|--|--|--|--|--|--|--|--|--|--|--|--|

**A2. SEX**       Male       Female

**A3. RACE**       Black (of African origin)       White (of European origin)       Other  
 Tribe      Please specify: 

|  |  |  |  |  |  |  |  |  |  |  |  |  |  |  |  |  |  |  |  |
|--|--|--|--|--|--|--|--|--|--|--|--|--|--|--|--|--|--|--|--|
|  |  |  |  |  |  |  |  |  |  |  |  |  |  |  |  |  |  |  |  |
|--|--|--|--|--|--|--|--|--|--|--|--|--|--|--|--|--|--|--|--|

**A4. DATE OF BIRTH (MM/DD/YYYY):**

|  |  |
|--|--|
|  |  |
|--|--|

 / 

|  |  |
|--|--|
|  |  |
|--|--|

 / 

|  |  |  |  |
|--|--|--|--|
|  |  |  |  |
|--|--|--|--|

**A5. AGE:**

|  |  |
|--|--|
|  |  |
|--|--|

**A6. In what country were you born?**

|  |  |  |  |  |  |  |  |  |  |  |  |  |  |  |  |  |  |  |  |
|--|--|--|--|--|--|--|--|--|--|--|--|--|--|--|--|--|--|--|--|
|  |  |  |  |  |  |  |  |  |  |  |  |  |  |  |  |  |  |  |  |
|--|--|--|--|--|--|--|--|--|--|--|--|--|--|--|--|--|--|--|--|

**A7a. Mother's Last Name:**

|  |  |  |  |  |  |  |  |  |  |  |  |  |  |  |  |  |  |  |  |
|--|--|--|--|--|--|--|--|--|--|--|--|--|--|--|--|--|--|--|--|
|  |  |  |  |  |  |  |  |  |  |  |  |  |  |  |  |  |  |  |  |
|--|--|--|--|--|--|--|--|--|--|--|--|--|--|--|--|--|--|--|--|

**Mother's First Name:**

|  |  |  |  |  |  |  |  |  |  |  |  |  |  |  |  |  |  |  |  |
|--|--|--|--|--|--|--|--|--|--|--|--|--|--|--|--|--|--|--|--|
|  |  |  |  |  |  |  |  |  |  |  |  |  |  |  |  |  |  |  |  |
|--|--|--|--|--|--|--|--|--|--|--|--|--|--|--|--|--|--|--|--|

**A7b. What is your mother's tribe?**

|  |  |  |  |  |  |  |  |  |  |  |  |  |  |  |  |  |  |  |  |
|--|--|--|--|--|--|--|--|--|--|--|--|--|--|--|--|--|--|--|--|
|  |  |  |  |  |  |  |  |  |  |  |  |  |  |  |  |  |  |  |  |
|--|--|--|--|--|--|--|--|--|--|--|--|--|--|--|--|--|--|--|--|

**A7c. Is she still alive?**       Yes       No       Unknown

**A8a. Father's Last Name:**

|  |  |  |  |  |  |  |  |  |  |  |  |  |  |  |  |  |  |  |  |
|--|--|--|--|--|--|--|--|--|--|--|--|--|--|--|--|--|--|--|--|
|  |  |  |  |  |  |  |  |  |  |  |  |  |  |  |  |  |  |  |  |
|--|--|--|--|--|--|--|--|--|--|--|--|--|--|--|--|--|--|--|--|

**Father's First Name:**

|  |  |  |  |  |  |  |  |  |  |  |  |  |  |  |  |  |  |  |  |
|--|--|--|--|--|--|--|--|--|--|--|--|--|--|--|--|--|--|--|--|
|  |  |  |  |  |  |  |  |  |  |  |  |  |  |  |  |  |  |  |  |
|--|--|--|--|--|--|--|--|--|--|--|--|--|--|--|--|--|--|--|--|

**A8b. What is your father's tribe?**

|  |  |  |  |  |  |  |  |  |  |  |  |  |  |  |  |  |  |  |  |
|--|--|--|--|--|--|--|--|--|--|--|--|--|--|--|--|--|--|--|--|
|  |  |  |  |  |  |  |  |  |  |  |  |  |  |  |  |  |  |  |  |
|--|--|--|--|--|--|--|--|--|--|--|--|--|--|--|--|--|--|--|--|

**A8c. Is he still alive?**       Yes       No       Unknown

**A9. MARITAL STATUS:**  
 Married       Living as Married       Widowed       Divorced       Separated       Never Married

# HEALTH INFORMATION (cont'd)

Family ID:

Identification Number: **G H A T R**

## NUMBER OF CHILDREN

A10. Total:        A11. First Marriage:        A14. Fourth Marriage:    
 A12. Second Marriage:        A15. Non-Marriage:    
 A13. Third Marriage:

A16a. Do you have a TWIN sister or brother?       Yes       No  
 A16b. Is he/she participating in this study?       Yes       No       Not Applicable

A17a. How many brothers do you have?    
 (Please check "Half" for half brothers.)

|    | Last Names                                                                            | First Names                                                                                              | Half                     | Age                                       |
|----|---------------------------------------------------------------------------------------|----------------------------------------------------------------------------------------------------------|--------------------------|-------------------------------------------|
| 1. | <input type="text"/>                                                                  | <input type="text"/>                                                                                     | <input type="checkbox"/> | <input type="text"/> <input type="text"/> |
|    | How many years did you live with him? <input type="text"/> <input type="text"/> years | Is he still alive? Yes <input type="checkbox"/> No <input type="checkbox"/> Unk <input type="checkbox"/> |                          |                                           |
| 2. | <input type="text"/>                                                                  | <input type="text"/>                                                                                     | <input type="checkbox"/> | <input type="text"/> <input type="text"/> |
|    | How many years did you live with him? <input type="text"/> <input type="text"/> years | Is he still alive? Yes <input type="checkbox"/> No <input type="checkbox"/> Unk <input type="checkbox"/> |                          |                                           |
| 3. | <input type="text"/>                                                                  | <input type="text"/>                                                                                     | <input type="checkbox"/> | <input type="text"/> <input type="text"/> |
|    | How many years did you live with him? <input type="text"/> <input type="text"/> years | Is he still alive? Yes <input type="checkbox"/> No <input type="checkbox"/> Unk <input type="checkbox"/> |                          |                                           |
| 4. | <input type="text"/>                                                                  | <input type="text"/>                                                                                     | <input type="checkbox"/> | <input type="text"/> <input type="text"/> |
|    | How many years did you live with him? <input type="text"/> <input type="text"/> years | Is he still alive? Yes <input type="checkbox"/> No <input type="checkbox"/> Unk <input type="checkbox"/> |                          |                                           |
| 5. | <input type="text"/>                                                                  | <input type="text"/>                                                                                     | <input type="checkbox"/> | <input type="text"/> <input type="text"/> |
|    | How many years did you live with him? <input type="text"/> <input type="text"/> years | Is he still alive? Yes <input type="checkbox"/> No <input type="checkbox"/> Unk <input type="checkbox"/> |                          |                                           |
| 6. | <input type="text"/>                                                                  | <input type="text"/>                                                                                     | <input type="checkbox"/> | <input type="text"/> <input type="text"/> |
|    | How many years did you live with him? <input type="text"/> <input type="text"/> years | Is he still alive? Yes <input type="checkbox"/> No <input type="checkbox"/> Unk <input type="checkbox"/> |                          |                                           |
| 7. | <input type="text"/>                                                                  | <input type="text"/>                                                                                     | <input type="checkbox"/> | <input type="text"/> <input type="text"/> |
|    | How many years did you live with him? <input type="text"/> <input type="text"/> years | Is he still alive? Yes <input type="checkbox"/> No <input type="checkbox"/> Unk <input type="checkbox"/> |                          |                                           |
| 8. | <input type="text"/>                                                                  | <input type="text"/>                                                                                     | <input type="checkbox"/> | <input type="text"/> <input type="text"/> |
|    | How many years did you live with him? <input type="text"/> <input type="text"/> years | Is he still alive? Yes <input type="checkbox"/> No <input type="checkbox"/> Unk <input type="checkbox"/> |                          |                                           |

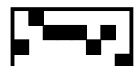

# HEALTH INFORMATION (cont'd)

Family ID:

Identification Number: **G H A T R**

**A17b. How many sisters do you have?**   
 (Please check "Half" for half sisters.)

|    | Last Names                                                                                                                                                                                                                                                                                                                                                           | First Names                                                                                                                                                                                                                                                                                                                                     | Half                     | Age                                       |
|----|----------------------------------------------------------------------------------------------------------------------------------------------------------------------------------------------------------------------------------------------------------------------------------------------------------------------------------------------------------------------|-------------------------------------------------------------------------------------------------------------------------------------------------------------------------------------------------------------------------------------------------------------------------------------------------------------------------------------------------|--------------------------|-------------------------------------------|
| 1. | <input type="text"/> | <input type="text"/> | <input type="checkbox"/> | <input type="text"/> <input type="text"/> |
|    | How many years did you live with her? <input type="text"/> <input type="text"/> years                                                                                                                                                                                                                                                                                | Is she still alive? Yes <input type="checkbox"/> No <input type="checkbox"/> Unk <input type="checkbox"/>                                                                                                                                                                                                                                       |                          |                                           |
| 2. | <input type="text"/>                      | <input type="text"/> | <input type="checkbox"/> | <input type="text"/> <input type="text"/> |
|    | How many years did you live with her? <input type="text"/> <input type="text"/> years                                                                                                                                                                                                                                                                                | Is she still alive? Yes <input type="checkbox"/> No <input type="checkbox"/> Unk <input type="checkbox"/>                                                                                                                                                                                                                                       |                          |                                           |
| 3. | <input type="text"/>                      | <input type="text"/> | <input type="checkbox"/> | <input type="text"/> <input type="text"/> |
|    | How many years did you live with her? <input type="text"/> <input type="text"/> years                                                                                                                                                                                                                                                                                | Is she still alive? Yes <input type="checkbox"/> No <input type="checkbox"/> Unk <input type="checkbox"/>                                                                                                                                                                                                                                       |                          |                                           |
| 4. | <input type="text"/>                      | <input type="text"/> | <input type="checkbox"/> | <input type="text"/> <input type="text"/> |
|    | How many years did you live with her? <input type="text"/> <input type="text"/> years                                                                                                                                                                                                                                                                                | Is she still alive? Yes <input type="checkbox"/> No <input type="checkbox"/> Unk <input type="checkbox"/>                                                                                                                                                                                                                                       |                          |                                           |
| 5. | <input type="text"/>                      | <input type="text"/> | <input type="checkbox"/> | <input type="text"/> <input type="text"/> |
|    | How many years did you live with her? <input type="text"/> <input type="text"/> years                                                                                                                                                                                                                                                                                | Is she still alive? Yes <input type="checkbox"/> No <input type="checkbox"/> Unk <input type="checkbox"/>                                                                                                                                                                                                                                       |                          |                                           |
| 6. | <input type="text"/>                      | <input type="text"/> | <input type="checkbox"/> | <input type="text"/> <input type="text"/> |
|    | How many years did you live with her? <input type="text"/> <input type="text"/> years                                                                                                                                                                                                                                                                                | Is she still alive? Yes <input type="checkbox"/> No <input type="checkbox"/> Unk <input type="checkbox"/>                                                                                                                                                                                                                                       |                          |                                           |
| 7. | <input type="text"/>                      | <input type="text"/> | <input type="checkbox"/> | <input type="text"/> <input type="text"/> |
|    | How many years did you live with her? <input type="text"/> <input type="text"/> years                                                                                                                                                                                                                                                                                | Is she still alive? Yes <input type="checkbox"/> No <input type="checkbox"/> Unk <input type="checkbox"/>                                                                                                                                                                                                                                       |                          |                                           |
| 8. | <input type="text"/>                      | <input type="text"/> | <input type="checkbox"/> | <input type="text"/> <input type="text"/> |
|    | How many years did you live with her? <input type="text"/> <input type="text"/> years                                                                                                                                                                                                                                                                                | Is she still alive? Yes <input type="checkbox"/> No <input type="checkbox"/> Unk <input type="checkbox"/>                                                                                                                                                                                                                                       |                          |                                           |

**A18. Education (Highest Level)**

|                         |                                                         |
|-------------------------|---------------------------------------------------------|
| No School (enter "0")   | # of Years<br><input type="text"/> <input type="text"/> |
| Primary                 | <input type="text"/> <input type="text"/>               |
| Junior Secondary School | <input type="text"/> <input type="text"/>               |
| Senior Secondary School | <input type="text"/> <input type="text"/>               |
| Polytechnical School    | <input type="text"/> <input type="text"/>               |
| University/College      | <input type="text"/> <input type="text"/>               |
| Post Graduate           | <input type="text"/> <input type="text"/>               |

**A19. Occupation**

- Farmer
- Trader
- Student
- Laborer (Unskilled)
- Craftsman (Skilled Labor) Specify: \_\_\_\_\_
- Office Worker
- Professional Specify: \_\_\_\_\_
- Unemployed
- Other Specify: \_\_\_\_\_

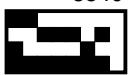

# HEALTH INFORMATION (cont'd)

Family ID:

Identification Number: **G H A T R**

## GENERAL HEALTH HISTORY

*Has a doctor ever told you that you have had:*

*AGE*

- |                                                 |                                                                                            |                                           |
|-------------------------------------------------|--------------------------------------------------------------------------------------------|-------------------------------------------|
| B1. Heart attack (taken to hospital)            | <input type="checkbox"/> Yes <input type="checkbox"/> No <input type="checkbox"/> Not Sure | <input type="text"/> <input type="text"/> |
| B2. Heart pain (angina, medication prescribed)  | <input type="checkbox"/> Yes <input type="checkbox"/> No <input type="checkbox"/> Not Sure | <input type="text"/> <input type="text"/> |
| B3. Heart bypass surgery                        | <input type="checkbox"/> Yes <input type="checkbox"/> No <input type="checkbox"/> Not Sure | <input type="text"/> <input type="text"/> |
| B4. Stroke                                      | <input type="checkbox"/> Yes <input type="checkbox"/> No <input type="checkbox"/> Not Sure | <input type="text"/> <input type="text"/> |
| B5. High blood pressure (medication prescribed) | <input type="checkbox"/> Yes <input type="checkbox"/> No <input type="checkbox"/> Not Sure | <input type="text"/> <input type="text"/> |
| B6. High blood cholesterol                      | <input type="checkbox"/> Yes <input type="checkbox"/> No <input type="checkbox"/> Not Sure | <input type="text"/> <input type="text"/> |
| B7. Diabetes                                    | <input type="checkbox"/> Yes <input type="checkbox"/> No <input type="checkbox"/> Not Sure | <input type="text"/> <input type="text"/> |
| B8. If YES to B7, was insulin prescribed?       | <input type="checkbox"/> Yes <input type="checkbox"/> No <input type="checkbox"/> Not Sure | <input type="text"/> <input type="text"/> |
| B9. Cancer (not skin cancer)                    | <input type="checkbox"/> Yes <input type="checkbox"/> No <input type="checkbox"/> Not Sure | <input type="text"/> <input type="text"/> |

What kind?

*Because of high blood pressure have you ever taken medication:*

B10. a) Prescription 1:  Yes  No  
 If YES, age when told:    Name of medication:

Are you currently taking this medication?  Yes  No

If yes/no, how long ago did you start/stop taking it?   year(s)   month(s)   day(s)

B10. b) Prescription 2:  Yes  No  
 If YES, age when told:    Name of medication:

Are you currently taking this medication?  Yes  No

If yes/no, how long ago did you start/stop taking it?   year(s)   month(s)   day(s)

B11. Are you currently taking any medication other than those above?  Yes  No

**Name(s) of Current Medication:**

1.                    For how long?   year(s)   month(s)   day(s)
2.                    For how long?   year(s)   month(s)   day(s)
3.                    For how long?   year(s)   month(s)   day(s)
4.                    For how long?   year(s)   month(s)   day(s)

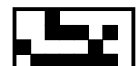

# HEALTH INFORMATION (cont'd)

Family ID:

Identification Number: **G H A T R**

## MEDICAL EXAM

Height:    CM.

Weight:    .   KGS.

Blood Pressure 1st Systolic (SBP):     
(required)

1st Diastolic (DBP):     
(required)

1st Pulse:     
(required)

2nd Systolic (SBP):     
(optional)

2nd Systolic (DBP):     
(optional)

2nd Pulse:     
(optional)

## TOBACCO USAGE

Smoker/Tobacco User:  Yes  No

Type of Tobacco:

A) Cigarettes----- Quantity (Cigarettes/Day):     /Day

B) Pipe----- Quantity (Pipes/Day):     /Day

C) Cigars----- Quantity (Number/Day):     /Day

D) Other types of tobacco ----- Type:      Amount:     /Day

## SAMPLE INFORMATION

DNA:  Yes  No

Date Isolated:   /   /     
Month Day Year

Storage Location:

Plasma:  Yes  No

Date Isolated:   /   /     
Month Day Year

Storage Location:

## METABOLIC PARAMETERS

Total Cholesterol    .  mg/dl

Triglycerides    .  mg/dl

LDL    .  mg/dl

Fasting Glucose    .  mg/dl

HDL    .  mg/dl

Notes:

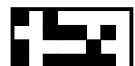

Supplement: pone.0162753.s001.pdf [file pone.0162753.s001.pdf]
